# Supplementary material
Source: PubMed Central journal article supplement (PMC10024752)
Supplement: 42003_2023_4687_MOESM1_ESM.pdf [file 42003_2023_4687_MOESM1_ESM.pdf]

# Proportion of All Danish SARS-CoV-2 Infections

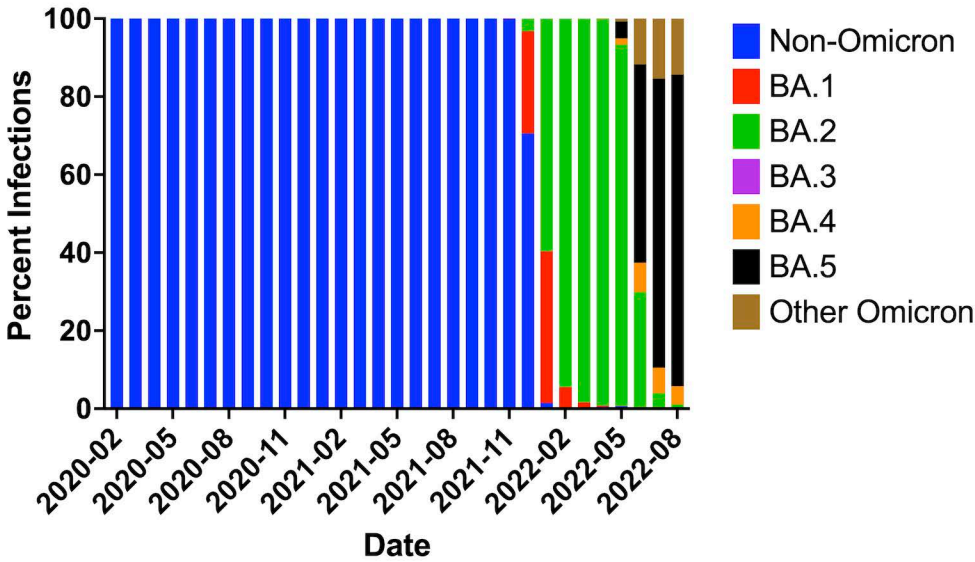

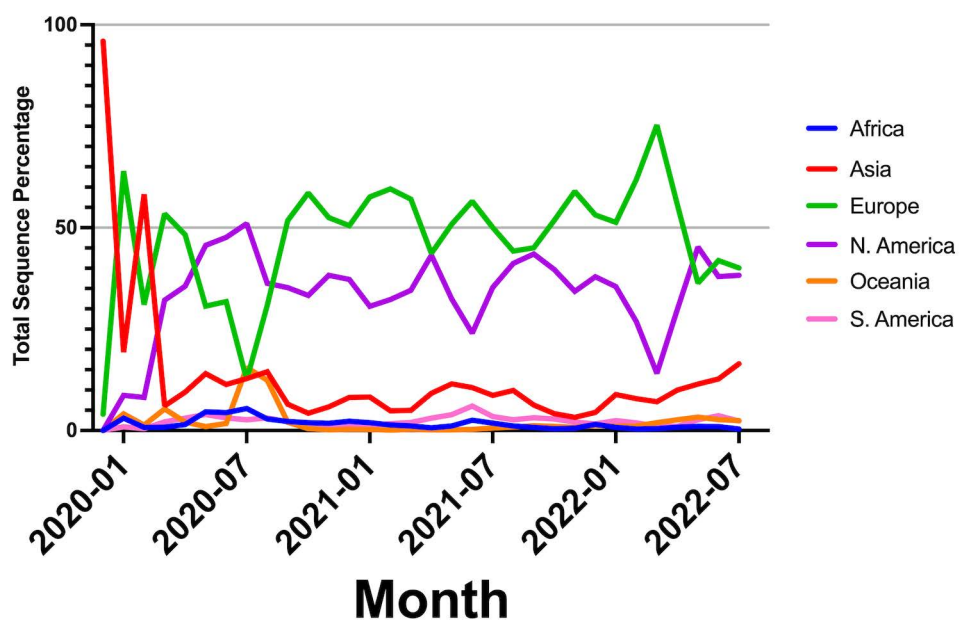

Supplementary Figure 1: Proportion of Omicron sub-lineages against total infections in Denmark.

Supplementary Figure 2: Worldwide percentage of cases sequenced stratified by continent over a period of one-month intervals.

## SUPPLEMENTARY NOTES 1

### **Data Availability**

GISAID Identifier: EPI\_SET\_220829mz

doi: [10.55876/gis8.220829mz](https://doi.org/10.55876/gis8.220829mz)

All genome sequences and associated metadata in this dataset are published in GISAID's EpiCoV database. To view the contributors of each individual sequence with details such as accession number, Virus name, Collection date, Originating Lab and Submitting Lab and the list of Authors, visit [10.55876/gis8.220829mz](https://gisaid.org/220829mz)

### **Data Snapshot**

- EPI\_SET\_220829mz is composed of 12,852,404 individual genome sequences.
- The collection dates range from 2010-12-06 to 2022-08-26;
- Data were collected in 219 countries and territories;
- All sequences in this dataset are compared relative to hCoV-19/Wuhan/WIV04/2019 (WIV04), the official reference sequence employed by GISAID (EPI\_ISL\_402124). Learn more at <https://gisaid.org/WIV04>.

## SUPPLEMENTARY NOTES 2

### **Data Availability**

GISAID Identifier: EPI\_SET\_220829qw

doi: [10.55876/gis8.220829qw](https://doi.org/10.55876/gis8.220829qw)

All genome sequences and associated metadata in this dataset are published in GISAID's EpiCoV database. To view the contributors of each individual sequence with details such as accession number, Virus name, Collection date, Originating Lab and Submitting Lab and the list of Authors, visit [10.55876/gis8.220829qw](https://gisaid.org/220829qw)

### **Data Snapshot**

- EPI\_SET\_220829qw is composed of 21,708 individual genome sequences.
- The collection dates range from 2020-08-15 to 2022-08-19;
- Data were collected in 1 countries and territories;
- All sequences in this dataset are compared relative to hCoV-19/Wuhan/WIV04/2019 (WIV04), the official reference sequence employed by GISAID (EPI\_ISL\_402124). Learn more at <https://gisaid.org/WIV04>.
