# Supplementary material
Source: PubMed Central journal article supplement (PMC10024752)
Supplement: 42003_2023_4687_MOESM2_ESM.pdf [file 42003_2023_4687_MOESM2_ESM.pdf]

## Description of Additional Supplementary Files

**File name:** Supplementary Data 1

**Description:** – ANOVA of Omicron-Omicron reinfection groups in figure 1d.

**File name:** Supplementary Data 2

**Description:** Denmark Omicron sublineage count table.

**File name:** Supplementary Data 3

**Description:** Data files for plots.
